# Supplementary material for: Integration of HIV and reproductive health services in public sector facilities: analysis of client flow data over time in Kenya
Source: PubMed Central journal article supplement (PMC6144905; doi:10.1136/bmjgh-2018-000867), 2018-09-14
Supplement: bmjgh-2018-000867supp001.pdf [file bmjgh-2018-000867supp001.pdf]

**Facility name:** \_\_\_\_\_ **Entry unit:** MCH  Other: \_\_\_\_\_

**Date today:**   -   -   **Client arrival time:**   :   **Sex of client:**  Male  Female

**Age:**   **DOB:**   -   -   **Client type:**  Adult (alone)  Adult with child (age of child \_\_\_\_\_)

**Client's residence:** District: \_\_\_\_\_ Division: \_\_\_\_\_ Location: \_\_\_\_\_

**Instructions to client:** Please take this form to each nurse, doctor or other counselor that you see during your visit at this clinic today. Please hand the form back in to one of the interviewers before you leave.

**Instructions to the provider:** Please complete a new row for each client you see. Fill in the time that the client arrives, and the time the client leaves. In the first column, tick for each of the services that you provide to the client. If you refer the client somewhere else, tick the appropriate box(es) in the second column, and indicate if it was an internal or external referral (or both). If you do not refer the client on, leave question 2 blank.

|                                                                                                                                                                                                                                                                                                                                                                                                                                                                                                                                                                                                                                                                                                                                                                                                                                                                                                                                                                                                                                                                                                                                                                                                                                                                                                                                                                                                                                                                                             |                                                     |                                        |                                                |                                               |                                           |                                    |                                                  |                                              |                                                        |                                                |                                                       |                                             |                                          |                                            |                                                       |                                                |                                            |                                    |                                                       |                                                     |                                              |  |                                                                                                                                                                                                                                                                                                                                                                                                                                                                                                                                                                                                                                                                                                                                                                                                                                                                                                                                                                                                                                                                                                                                                                                                                                                                                                                                                                                                                                                                                                                                                                                                 |                                          |                                    |                                             |                                           |                                        |                                |                                               |                                              |                                                     |                                                |                                                    |                                         |                                       |                                        |                                                    |                                            |                                         |                                |                                                   |                                                 |                                          |  |
|---------------------------------------------------------------------------------------------------------------------------------------------------------------------------------------------------------------------------------------------------------------------------------------------------------------------------------------------------------------------------------------------------------------------------------------------------------------------------------------------------------------------------------------------------------------------------------------------------------------------------------------------------------------------------------------------------------------------------------------------------------------------------------------------------------------------------------------------------------------------------------------------------------------------------------------------------------------------------------------------------------------------------------------------------------------------------------------------------------------------------------------------------------------------------------------------------------------------------------------------------------------------------------------------------------------------------------------------------------------------------------------------------------------------------------------------------------------------------------------------|-----------------------------------------------------|----------------------------------------|------------------------------------------------|-----------------------------------------------|-------------------------------------------|------------------------------------|--------------------------------------------------|----------------------------------------------|--------------------------------------------------------|------------------------------------------------|-------------------------------------------------------|---------------------------------------------|------------------------------------------|--------------------------------------------|-------------------------------------------------------|------------------------------------------------|--------------------------------------------|------------------------------------|-------------------------------------------------------|-----------------------------------------------------|----------------------------------------------|--|-------------------------------------------------------------------------------------------------------------------------------------------------------------------------------------------------------------------------------------------------------------------------------------------------------------------------------------------------------------------------------------------------------------------------------------------------------------------------------------------------------------------------------------------------------------------------------------------------------------------------------------------------------------------------------------------------------------------------------------------------------------------------------------------------------------------------------------------------------------------------------------------------------------------------------------------------------------------------------------------------------------------------------------------------------------------------------------------------------------------------------------------------------------------------------------------------------------------------------------------------------------------------------------------------------------------------------------------------------------------------------------------------------------------------------------------------------------------------------------------------------------------------------------------------------------------------------------------------|------------------------------------------|------------------------------------|---------------------------------------------|-------------------------------------------|----------------------------------------|--------------------------------|-----------------------------------------------|----------------------------------------------|-----------------------------------------------------|------------------------------------------------|----------------------------------------------------|-----------------------------------------|---------------------------------------|----------------------------------------|----------------------------------------------------|--------------------------------------------|-----------------------------------------|--------------------------------|---------------------------------------------------|-------------------------------------------------|------------------------------------------|--|
| <b>1<sup>st</sup> Provider seen:</b> <b>Consultation start time:</b> <input type="text"/> <input type="text"/> : <input type="text"/> <input type="text"/> <b>Consultation end time:</b> <input type="text"/> <input type="text"/> : <input type="text"/> <input type="text"/>                                                                                                                                                                                                                                                                                                                                                                                                                                                                                                                                                                                                                                                                                                                                                                                                                                                                                                                                                                                                                                                                                                                                                                                                              |                                                     |                                        |                                                |                                               |                                           |                                    |                                                  |                                              |                                                        |                                                |                                                       |                                             |                                          |                                            |                                                       |                                                |                                            |                                    |                                                       |                                                     |                                              |  |                                                                                                                                                                                                                                                                                                                                                                                                                                                                                                                                                                                                                                                                                                                                                                                                                                                                                                                                                                                                                                                                                                                                                                                                                                                                                                                                                                                                                                                                                                                                                                                                 |                                          |                                    |                                             |                                           |                                        |                                |                                               |                                              |                                                     |                                                |                                                    |                                         |                                       |                                        |                                                    |                                            |                                         |                                |                                                   |                                                 |                                          |  |
| <p><b>1. What is client seen for? (tick all that apply)</b></p> <table style="width:100%; border: none;"> <tr> <td style="width: 50%;"><input type="checkbox"/> 1. Ante-natal care</td> <td style="width: 50%;"><input type="checkbox"/> 12. Pap smear</td> </tr> <tr> <td><input type="checkbox"/> 2. Child immunization</td> <td><input type="checkbox"/> 13. Pharmacy (drugs)</td> </tr> <tr> <td><input type="checkbox"/> 3. Child welfare</td> <td><input type="checkbox"/> 14. PMTCT</td> </tr> <tr> <td><input type="checkbox"/> 4. Counseling (general)</td> <td><input type="checkbox"/> 15. PNC baby (exam)</td> </tr> <tr> <td><input type="checkbox"/> 5. Family planning counseling</td> <td><input type="checkbox"/> 16. PNC mother (exam)</td> </tr> <tr> <td><input type="checkbox"/> 6. Family planning provision</td> <td><input type="checkbox"/> 17. STI counseling</td> </tr> <tr> <td><input type="checkbox"/> 7. Gynecologist</td> <td><input type="checkbox"/> 18. STI treatment</td> </tr> <tr> <td><input type="checkbox"/> 8. HIV care (pre ART or ART)</td> <td><input type="checkbox"/> 19. TB care/treatment</td> </tr> <tr> <td><input type="checkbox"/> 9. HIV counseling</td> <td><input type="checkbox"/> 20. X-ray</td> </tr> <tr> <td><input type="checkbox"/> 10. HIV testing (blood test)</td> <td><input type="checkbox"/> 21. Other (specify): _____</td> </tr> <tr> <td><input type="checkbox"/> 11. Laboratory test</td> <td></td> </tr> </table> | <input type="checkbox"/> 1. Ante-natal care         | <input type="checkbox"/> 12. Pap smear | <input type="checkbox"/> 2. Child immunization | <input type="checkbox"/> 13. Pharmacy (drugs) | <input type="checkbox"/> 3. Child welfare | <input type="checkbox"/> 14. PMTCT | <input type="checkbox"/> 4. Counseling (general) | <input type="checkbox"/> 15. PNC baby (exam) | <input type="checkbox"/> 5. Family planning counseling | <input type="checkbox"/> 16. PNC mother (exam) | <input type="checkbox"/> 6. Family planning provision | <input type="checkbox"/> 17. STI counseling | <input type="checkbox"/> 7. Gynecologist | <input type="checkbox"/> 18. STI treatment | <input type="checkbox"/> 8. HIV care (pre ART or ART) | <input type="checkbox"/> 19. TB care/treatment | <input type="checkbox"/> 9. HIV counseling | <input type="checkbox"/> 20. X-ray | <input type="checkbox"/> 10. HIV testing (blood test) | <input type="checkbox"/> 21. Other (specify): _____ | <input type="checkbox"/> 11. Laboratory test |  | <p><b>2. What is client referred for? (tick all that apply)</b></p> <table style="width:100%; border: none;"> <tr> <td style="width: 50%;"><input type="checkbox"/> Ante-natal care</td> <td style="width: 50%;"><input type="checkbox"/> Pap smear</td> </tr> <tr> <td><input type="checkbox"/> Child immunization</td> <td><input type="checkbox"/> Pharmacy (drugs)</td> </tr> <tr> <td><input type="checkbox"/> Child welfare</td> <td><input type="checkbox"/> PMTCT</td> </tr> <tr> <td><input type="checkbox"/> Counseling (general)</td> <td><input type="checkbox"/> PNC for baby (exam)</td> </tr> <tr> <td><input type="checkbox"/> Family planning counseling</td> <td><input type="checkbox"/> PNC for mother (exam)</td> </tr> <tr> <td><input type="checkbox"/> Family planning provision</td> <td><input type="checkbox"/> STI counseling</td> </tr> <tr> <td><input type="checkbox"/> Gynecologist</td> <td><input type="checkbox"/> STI treatment</td> </tr> <tr> <td><input type="checkbox"/> HIV care (pre ART or ART)</td> <td><input type="checkbox"/> TB care/treatment</td> </tr> <tr> <td><input type="checkbox"/> HIV counseling</td> <td><input type="checkbox"/> X-ray</td> </tr> <tr> <td><input type="checkbox"/> HIV testing (blood test)</td> <td><input type="checkbox"/> Other (specify): _____</td> </tr> <tr> <td><input type="checkbox"/> Laboratory test</td> <td></td> </tr> </table> <p><b>Is this/are these:</b> <input type="checkbox"/> Internal referral(s) <input type="checkbox"/> External referral(s)<br/> <b>If external, where?</b> _____</p> | <input type="checkbox"/> Ante-natal care | <input type="checkbox"/> Pap smear | <input type="checkbox"/> Child immunization | <input type="checkbox"/> Pharmacy (drugs) | <input type="checkbox"/> Child welfare | <input type="checkbox"/> PMTCT | <input type="checkbox"/> Counseling (general) | <input type="checkbox"/> PNC for baby (exam) | <input type="checkbox"/> Family planning counseling | <input type="checkbox"/> PNC for mother (exam) | <input type="checkbox"/> Family planning provision | <input type="checkbox"/> STI counseling | <input type="checkbox"/> Gynecologist | <input type="checkbox"/> STI treatment | <input type="checkbox"/> HIV care (pre ART or ART) | <input type="checkbox"/> TB care/treatment | <input type="checkbox"/> HIV counseling | <input type="checkbox"/> X-ray | <input type="checkbox"/> HIV testing (blood test) | <input type="checkbox"/> Other (specify): _____ | <input type="checkbox"/> Laboratory test |  |
| <input type="checkbox"/> 1. Ante-natal care                                                                                                                                                                                                                                                                                                                                                                                                                                                                                                                                                                                                                                                                                                                                                                                                                                                                                                                                                                                                                                                                                                                                                                                                                                                                                                                                                                                                                                                 | <input type="checkbox"/> 12. Pap smear              |                                        |                                                |                                               |                                           |                                    |                                                  |                                              |                                                        |                                                |                                                       |                                             |                                          |                                            |                                                       |                                                |                                            |                                    |                                                       |                                                     |                                              |  |                                                                                                                                                                                                                                                                                                                                                                                                                                                                                                                                                                                                                                                                                                                                                                                                                                                                                                                                                                                                                                                                                                                                                                                                                                                                                                                                                                                                                                                                                                                                                                                                 |                                          |                                    |                                             |                                           |                                        |                                |                                               |                                              |                                                     |                                                |                                                    |                                         |                                       |                                        |                                                    |                                            |                                         |                                |                                                   |                                                 |                                          |  |
| <input type="checkbox"/> 2. Child immunization                                                                                                                                                                                                                                                                                                                                                                                                                                                                                                                                                                                                                                                                                                                                                                                                                                                                                                                                                                                                                                                                                                                                                                                                                                                                                                                                                                                                                                              | <input type="checkbox"/> 13. Pharmacy (drugs)       |                                        |                                                |                                               |                                           |                                    |                                                  |                                              |                                                        |                                                |                                                       |                                             |                                          |                                            |                                                       |                                                |                                            |                                    |                                                       |                                                     |                                              |  |                                                                                                                                                                                                                                                                                                                                                                                                                                                                                                                                                                                                                                                                                                                                                                                                                                                                                                                                                                                                                                                                                                                                                                                                                                                                                                                                                                                                                                                                                                                                                                                                 |                                          |                                    |                                             |                                           |                                        |                                |                                               |                                              |                                                     |                                                |                                                    |                                         |                                       |                                        |                                                    |                                            |                                         |                                |                                                   |                                                 |                                          |  |
| <input type="checkbox"/> 3. Child welfare                                                                                                                                                                                                                                                                                                                                                                                                                                                                                                                                                                                                                                                                                                                                                                                                                                                                                                                                                                                                                                                                                                                                                                                                                                                                                                                                                                                                                                                   | <input type="checkbox"/> 14. PMTCT                  |                                        |                                                |                                               |                                           |                                    |                                                  |                                              |                                                        |                                                |                                                       |                                             |                                          |                                            |                                                       |                                                |                                            |                                    |                                                       |                                                     |                                              |  |                                                                                                                                                                                                                                                                                                                                                                                                                                                                                                                                                                                                                                                                                                                                                                                                                                                                                                                                                                                                                                                                                                                                                                                                                                                                                                                                                                                                                                                                                                                                                                                                 |                                          |                                    |                                             |                                           |                                        |                                |                                               |                                              |                                                     |                                                |                                                    |                                         |                                       |                                        |                                                    |                                            |                                         |                                |                                                   |                                                 |                                          |  |
| <input type="checkbox"/> 4. Counseling (general)                                                                                                                                                                                                                                                                                                                                                                                                                                                                                                                                                                                                                                                                                                                                                                                                                                                                                                                                                                                                                                                                                                                                                                                                                                                                                                                                                                                                                                            | <input type="checkbox"/> 15. PNC baby (exam)        |                                        |                                                |                                               |                                           |                                    |                                                  |                                              |                                                        |                                                |                                                       |                                             |                                          |                                            |                                                       |                                                |                                            |                                    |                                                       |                                                     |                                              |  |                                                                                                                                                                                                                                                                                                                                                                                                                                                                                                                                                                                                                                                                                                                                                                                                                                                                                                                                                                                                                                                                                                                                                                                                                                                                                                                                                                                                                                                                                                                                                                                                 |                                          |                                    |                                             |                                           |                                        |                                |                                               |                                              |                                                     |                                                |                                                    |                                         |                                       |                                        |                                                    |                                            |                                         |                                |                                                   |                                                 |                                          |  |
| <input type="checkbox"/> 5. Family planning counseling                                                                                                                                                                                                                                                                                                                                                                                                                                                                                                                                                                                                                                                                                                                                                                                                                                                                                                                                                                                                                                                                                                                                                                                                                                                                                                                                                                                                                                      | <input type="checkbox"/> 16. PNC mother (exam)      |                                        |                                                |                                               |                                           |                                    |                                                  |                                              |                                                        |                                                |                                                       |                                             |                                          |                                            |                                                       |                                                |                                            |                                    |                                                       |                                                     |                                              |  |                                                                                                                                                                                                                                                                                                                                                                                                                                                                                                                                                                                                                                                                                                                                                                                                                                                                                                                                                                                                                                                                                                                                                                                                                                                                                                                                                                                                                                                                                                                                                                                                 |                                          |                                    |                                             |                                           |                                        |                                |                                               |                                              |                                                     |                                                |                                                    |                                         |                                       |                                        |                                                    |                                            |                                         |                                |                                                   |                                                 |                                          |  |
| <input type="checkbox"/> 6. Family planning provision                                                                                                                                                                                                                                                                                                                                                                                                                                                                                                                                                                                                                                                                                                                                                                                                                                                                                                                                                                                                                                                                                                                                                                                                                                                                                                                                                                                                                                       | <input type="checkbox"/> 17. STI counseling         |                                        |                                                |                                               |                                           |                                    |                                                  |                                              |                                                        |                                                |                                                       |                                             |                                          |                                            |                                                       |                                                |                                            |                                    |                                                       |                                                     |                                              |  |                                                                                                                                                                                                                                                                                                                                                                                                                                                                                                                                                                                                                                                                                                                                                                                                                                                                                                                                                                                                                                                                                                                                                                                                                                                                                                                                                                                                                                                                                                                                                                                                 |                                          |                                    |                                             |                                           |                                        |                                |                                               |                                              |                                                     |                                                |                                                    |                                         |                                       |                                        |                                                    |                                            |                                         |                                |                                                   |                                                 |                                          |  |
| <input type="checkbox"/> 7. Gynecologist                                                                                                                                                                                                                                                                                                                                                                                                                                                                                                                                                                                                                                                                                                                                                                                                                                                                                                                                                                                                                                                                                                                                                                                                                                                                                                                                                                                                                                                    | <input type="checkbox"/> 18. STI treatment          |                                        |                                                |                                               |                                           |                                    |                                                  |                                              |                                                        |                                                |                                                       |                                             |                                          |                                            |                                                       |                                                |                                            |                                    |                                                       |                                                     |                                              |  |                                                                                                                                                                                                                                                                                                                                                                                                                                                                                                                                                                                                                                                                                                                                                                                                                                                                                                                                                                                                                                                                                                                                                                                                                                                                                                                                                                                                                                                                                                                                                                                                 |                                          |                                    |                                             |                                           |                                        |                                |                                               |                                              |                                                     |                                                |                                                    |                                         |                                       |                                        |                                                    |                                            |                                         |                                |                                                   |                                                 |                                          |  |
| <input type="checkbox"/> 8. HIV care (pre ART or ART)                                                                                                                                                                                                                                                                                                                                                                                                                                                                                                                                                                                                                                                                                                                                                                                                                                                                                                                                                                                                                                                                                                                                                                                                                                                                                                                                                                                                                                       | <input type="checkbox"/> 19. TB care/treatment      |                                        |                                                |                                               |                                           |                                    |                                                  |                                              |                                                        |                                                |                                                       |                                             |                                          |                                            |                                                       |                                                |                                            |                                    |                                                       |                                                     |                                              |  |                                                                                                                                                                                                                                                                                                                                                                                                                                                                                                                                                                                                                                                                                                                                                                                                                                                                                                                                                                                                                                                                                                                                                                                                                                                                                                                                                                                                                                                                                                                                                                                                 |                                          |                                    |                                             |                                           |                                        |                                |                                               |                                              |                                                     |                                                |                                                    |                                         |                                       |                                        |                                                    |                                            |                                         |                                |                                                   |                                                 |                                          |  |
| <input type="checkbox"/> 9. HIV counseling                                                                                                                                                                                                                                                                                                                                                                                                                                                                                                                                                                                                                                                                                                                                                                                                                                                                                                                                                                                                                                                                                                                                                                                                                                                                                                                                                                                                                                                  | <input type="checkbox"/> 20. X-ray                  |                                        |                                                |                                               |                                           |                                    |                                                  |                                              |                                                        |                                                |                                                       |                                             |                                          |                                            |                                                       |                                                |                                            |                                    |                                                       |                                                     |                                              |  |                                                                                                                                                                                                                                                                                                                                                                                                                                                                                                                                                                                                                                                                                                                                                                                                                                                                                                                                                                                                                                                                                                                                                                                                                                                                                                                                                                                                                                                                                                                                                                                                 |                                          |                                    |                                             |                                           |                                        |                                |                                               |                                              |                                                     |                                                |                                                    |                                         |                                       |                                        |                                                    |                                            |                                         |                                |                                                   |                                                 |                                          |  |
| <input type="checkbox"/> 10. HIV testing (blood test)                                                                                                                                                                                                                                                                                                                                                                                                                                                                                                                                                                                                                                                                                                                                                                                                                                                                                                                                                                                                                                                                                                                                                                                                                                                                                                                                                                                                                                       | <input type="checkbox"/> 21. Other (specify): _____ |                                        |                                                |                                               |                                           |                                    |                                                  |                                              |                                                        |                                                |                                                       |                                             |                                          |                                            |                                                       |                                                |                                            |                                    |                                                       |                                                     |                                              |  |                                                                                                                                                                                                                                                                                                                                                                                                                                                                                                                                                                                                                                                                                                                                                                                                                                                                                                                                                                                                                                                                                                                                                                                                                                                                                                                                                                                                                                                                                                                                                                                                 |                                          |                                    |                                             |                                           |                                        |                                |                                               |                                              |                                                     |                                                |                                                    |                                         |                                       |                                        |                                                    |                                            |                                         |                                |                                                   |                                                 |                                          |  |
| <input type="checkbox"/> 11. Laboratory test                                                                                                                                                                                                                                                                                                                                                                                                                                                                                                                                                                                                                                                                                                                                                                                                                                                                                                                                                                                                                                                                                                                                                                                                                                                                                                                                                                                                                                                |                                                     |                                        |                                                |                                               |                                           |                                    |                                                  |                                              |                                                        |                                                |                                                       |                                             |                                          |                                            |                                                       |                                                |                                            |                                    |                                                       |                                                     |                                              |  |                                                                                                                                                                                                                                                                                                                                                                                                                                                                                                                                                                                                                                                                                                                                                                                                                                                                                                                                                                                                                                                                                                                                                                                                                                                                                                                                                                                                                                                                                                                                                                                                 |                                          |                                    |                                             |                                           |                                        |                                |                                               |                                              |                                                     |                                                |                                                    |                                         |                                       |                                        |                                                    |                                            |                                         |                                |                                                   |                                                 |                                          |  |
| <input type="checkbox"/> Ante-natal care                                                                                                                                                                                                                                                                                                                                                                                                                                                                                                                                                                                                                                                                                                                                                                                                                                                                                                                                                                                                                                                                                                                                                                                                                                                                                                                                                                                                                                                    | <input type="checkbox"/> Pap smear                  |                                        |                                                |                                               |                                           |                                    |                                                  |                                              |                                                        |                                                |                                                       |                                             |                                          |                                            |                                                       |                                                |                                            |                                    |                                                       |                                                     |                                              |  |                                                                                                                                                                                                                                                                                                                                                                                                                                                                                                                                                                                                                                                                                                                                                                                                                                                                                                                                                                                                                                                                                                                                                                                                                                                                                                                                                                                                                                                                                                                                                                                                 |                                          |                                    |                                             |                                           |                                        |                                |                                               |                                              |                                                     |                                                |                                                    |                                         |                                       |                                        |                                                    |                                            |                                         |                                |                                                   |                                                 |                                          |  |
| <input type="checkbox"/> Child immunization                                                                                                                                                                                                                                                                                                                                                                                                                                                                                                                                                                                                                                                                                                                                                                                                                                                                                                                                                                                                                                                                                                                                                                                                                                                                                                                                                                                                                                                 | <input type="checkbox"/> Pharmacy (drugs)           |                                        |                                                |                                               |                                           |                                    |                                                  |                                              |                                                        |                                                |                                                       |                                             |                                          |                                            |                                                       |                                                |                                            |                                    |                                                       |                                                     |                                              |  |                                                                                                                                                                                                                                                                                                                                                                                                                                                                                                                                                                                                                                                                                                                                                                                                                                                                                                                                                                                                                                                                                                                                                                                                                                                                                                                                                                                                                                                                                                                                                                                                 |                                          |                                    |                                             |                                           |                                        |                                |                                               |                                              |                                                     |                                                |                                                    |                                         |                                       |                                        |                                                    |                                            |                                         |                                |                                                   |                                                 |                                          |  |
| <input type="checkbox"/> Child welfare                                                                                                                                                                                                                                                                                                                                                                                                                                                                                                                                                                                                                                                                                                                                                                                                                                                                                                                                                                                                                                                                                                                                                                                                                                                                                                                                                                                                                                                      | <input type="checkbox"/> PMTCT                      |                                        |                                                |                                               |                                           |                                    |                                                  |                                              |                                                        |                                                |                                                       |                                             |                                          |                                            |                                                       |                                                |                                            |                                    |                                                       |                                                     |                                              |  |                                                                                                                                                                                                                                                                                                                                                                                                                                                                                                                                                                                                                                                                                                                                                                                                                                                                                                                                                                                                                                                                                                                                                                                                                                                                                                                                                                                                                                                                                                                                                                                                 |                                          |                                    |                                             |                                           |                                        |                                |                                               |                                              |                                                     |                                                |                                                    |                                         |                                       |                                        |                                                    |                                            |                                         |                                |                                                   |                                                 |                                          |  |
| <input type="checkbox"/> Counseling (general)                                                                                                                                                                                                                                                                                                                                                                                                                                                                                                                                                                                                                                                                                                                                                                                                                                                                                                                                                                                                                                                                                                                                                                                                                                                                                                                                                                                                                                               | <input type="checkbox"/> PNC for baby (exam)        |                                        |                                                |                                               |                                           |                                    |                                                  |                                              |                                                        |                                                |                                                       |                                             |                                          |                                            |                                                       |                                                |                                            |                                    |                                                       |                                                     |                                              |  |                                                                                                                                                                                                                                                                                                                                                                                                                                                                                                                                                                                                                                                                                                                                                                                                                                                                                                                                                                                                                                                                                                                                                                                                                                                                                                                                                                                                                                                                                                                                                                                                 |                                          |                                    |                                             |                                           |                                        |                                |                                               |                                              |                                                     |                                                |                                                    |                                         |                                       |                                        |                                                    |                                            |                                         |                                |                                                   |                                                 |                                          |  |
| <input type="checkbox"/> Family planning counseling                                                                                                                                                                                                                                                                                                                                                                                                                                                                                                                                                                                                                                                                                                                                                                                                                                                                                                                                                                                                                                                                                                                                                                                                                                                                                                                                                                                                                                         | <input type="checkbox"/> PNC for mother (exam)      |                                        |                                                |                                               |                                           |                                    |                                                  |                                              |                                                        |                                                |                                                       |                                             |                                          |                                            |                                                       |                                                |                                            |                                    |                                                       |                                                     |                                              |  |                                                                                                                                                                                                                                                                                                                                                                                                                                                                                                                                                                                                                                                                                                                                                                                                                                                                                                                                                                                                                                                                                                                                                                                                                                                                                                                                                                                                                                                                                                                                                                                                 |                                          |                                    |                                             |                                           |                                        |                                |                                               |                                              |                                                     |                                                |                                                    |                                         |                                       |                                        |                                                    |                                            |                                         |                                |                                                   |                                                 |                                          |  |
| <input type="checkbox"/> Family planning provision                                                                                                                                                                                                                                                                                                                                                                                                                                                                                                                                                                                                                                                                                                                                                                                                                                                                                                                                                                                                                                                                                                                                                                                                                                                                                                                                                                                                                                          | <input type="checkbox"/> STI counseling             |                                        |                                                |                                               |                                           |                                    |                                                  |                                              |                                                        |                                                |                                                       |                                             |                                          |                                            |                                                       |                                                |                                            |                                    |                                                       |                                                     |                                              |  |                                                                                                                                                                                                                                                                                                                                                                                                                                                                                                                                                                                                                                                                                                                                                                                                                                                                                                                                                                                                                                                                                                                                                                                                                                                                                                                                                                                                                                                                                                                                                                                                 |                                          |                                    |                                             |                                           |                                        |                                |                                               |                                              |                                                     |                                                |                                                    |                                         |                                       |                                        |                                                    |                                            |                                         |                                |                                                   |                                                 |                                          |  |
| <input type="checkbox"/> Gynecologist                                                                                                                                                                                                                                                                                                                                                                                                                                                                                                                                                                                                                                                                                                                                                                                                                                                                                                                                                                                                                                                                                                                                                                                                                                                                                                                                                                                                                                                       | <input type="checkbox"/> STI treatment              |                                        |                                                |                                               |                                           |                                    |                                                  |                                              |                                                        |                                                |                                                       |                                             |                                          |                                            |                                                       |                                                |                                            |                                    |                                                       |                                                     |                                              |  |                                                                                                                                                                                                                                                                                                                                                                                                                                                                                                                                                                                                                                                                                                                                                                                                                                                                                                                                                                                                                                                                                                                                                                                                                                                                                                                                                                                                                                                                                                                                                                                                 |                                          |                                    |                                             |                                           |                                        |                                |                                               |                                              |                                                     |                                                |                                                    |                                         |                                       |                                        |                                                    |                                            |                                         |                                |                                                   |                                                 |                                          |  |
| <input type="checkbox"/> HIV care (pre ART or ART)                                                                                                                                                                                                                                                                                                                                                                                                                                                                                                                                                                                                                                                                                                                                                                                                                                                                                                                                                                                                                                                                                                                                                                                                                                                                                                                                                                                                                                          | <input type="checkbox"/> TB care/treatment          |                                        |                                                |                                               |                                           |                                    |                                                  |                                              |                                                        |                                                |                                                       |                                             |                                          |                                            |                                                       |                                                |                                            |                                    |                                                       |                                                     |                                              |  |                                                                                                                                                                                                                                                                                                                                                                                                                                                                                                                                                                                                                                                                                                                                                                                                                                                                                                                                                                                                                                                                                                                                                                                                                                                                                                                                                                                                                                                                                                                                                                                                 |                                          |                                    |                                             |                                           |                                        |                                |                                               |                                              |                                                     |                                                |                                                    |                                         |                                       |                                        |                                                    |                                            |                                         |                                |                                                   |                                                 |                                          |  |
| <input type="checkbox"/> HIV counseling                                                                                                                                                                                                                                                                                                                                                                                                                                                                                                                                                                                                                                                                                                                                                                                                                                                                                                                                                                                                                                                                                                                                                                                                                                                                                                                                                                                                                                                     | <input type="checkbox"/> X-ray                      |                                        |                                                |                                               |                                           |                                    |                                                  |                                              |                                                        |                                                |                                                       |                                             |                                          |                                            |                                                       |                                                |                                            |                                    |                                                       |                                                     |                                              |  |                                                                                                                                                                                                                                                                                                                                                                                                                                                                                                                                                                                                                                                                                                                                                                                                                                                                                                                                                                                                                                                                                                                                                                                                                                                                                                                                                                                                                                                                                                                                                                                                 |                                          |                                    |                                             |                                           |                                        |                                |                                               |                                              |                                                     |                                                |                                                    |                                         |                                       |                                        |                                                    |                                            |                                         |                                |                                                   |                                                 |                                          |  |
| <input type="checkbox"/> HIV testing (blood test)                                                                                                                                                                                                                                                                                                                                                                                                                                                                                                                                                                                                                                                                                                                                                                                                                                                                                                                                                                                                                                                                                                                                                                                                                                                                                                                                                                                                                                           | <input type="checkbox"/> Other (specify): _____     |                                        |                                                |                                               |                                           |                                    |                                                  |                                              |                                                        |                                                |                                                       |                                             |                                          |                                            |                                                       |                                                |                                            |                                    |                                                       |                                                     |                                              |  |                                                                                                                                                                                                                                                                                                                                                                                                                                                                                                                                                                                                                                                                                                                                                                                                                                                                                                                                                                                                                                                                                                                                                                                                                                                                                                                                                                                                                                                                                                                                                                                                 |                                          |                                    |                                             |                                           |                                        |                                |                                               |                                              |                                                     |                                                |                                                    |                                         |                                       |                                        |                                                    |                                            |                                         |                                |                                                   |                                                 |                                          |  |
| <input type="checkbox"/> Laboratory test                                                                                                                                                                                                                                                                                                                                                                                                                                                                                                                                                                                                                                                                                                                                                                                                                                                                                                                                                                                                                                                                                                                                                                                                                                                                                                                                                                                                                                                    |                                                     |                                        |                                                |                                               |                                           |                                    |                                                  |                                              |                                                        |                                                |                                                       |                                             |                                          |                                            |                                                       |                                                |                                            |                                    |                                                       |                                                     |                                              |  |                                                                                                                                                                                                                                                                                                                                                                                                                                                                                                                                                                                                                                                                                                                                                                                                                                                                                                                                                                                                                                                                                                                                                                                                                                                                                                                                                                                                                                                                                                                                                                                                 |                                          |                                    |                                             |                                           |                                        |                                |                                               |                                              |                                                     |                                                |                                                    |                                         |                                       |                                        |                                                    |                                            |                                         |                                |                                                   |                                                 |                                          |  |
| <b>2<sup>nd</sup> Provider seen:</b> <b>Consultation start time:</b> <input type="text"/> <input type="text"/> : <input type="text"/> <input type="text"/> <b>Consultation end time:</b> <input type="text"/> <input type="text"/> : <input type="text"/> <input type="text"/>                                                                                                                                                                                                                                                                                                                                                                                                                                                                                                                                                                                                                                                                                                                                                                                                                                                                                                                                                                                                                                                                                                                                                                                                              |                                                     |                                        |                                                |                                               |                                           |                                    |                                                  |                                              |                                                        |                                                |                                                       |                                             |                                          |                                            |                                                       |                                                |                                            |                                    |                                                       |                                                     |                                              |  |                                                                                                                                                                                                                                                                                                                                                                                                                                                                                                                                                                                                                                                                                                                                                                                                                                                                                                                                                                                                                                                                                                                                                                                                                                                                                                                                                                                                                                                                                                                                                                                                 |                                          |                                    |                                             |                                           |                                        |                                |                                               |                                              |                                                     |                                                |                                                    |                                         |                                       |                                        |                                                    |                                            |                                         |                                |                                                   |                                                 |                                          |  |
| <p><b>1. What is client seen for? (tick all that apply)</b></p> <table style="width:100%; border: none;"> <tr> <td style="width: 50%;"><input type="checkbox"/> Ante-natal care</td> <td style="width: 50%;"><input type="checkbox"/> Pap smear</td> </tr> <tr> <td><input type="checkbox"/> Child immunization</td> <td><input type="checkbox"/> Pharmacy (drugs)</td> </tr> <tr> <td><input type="checkbox"/> Child welfare</td> <td><input type="checkbox"/> PMTCT</td> </tr> <tr> <td><input type="checkbox"/> Counseling (general)</td> <td><input type="checkbox"/> PNC for baby (exam)</td> </tr> <tr> <td><input type="checkbox"/> Family planning counseling</td> <td><input type="checkbox"/> PNC for mother (exam)</td> </tr> <tr> <td><input type="checkbox"/> Family planning provision</td> <td><input type="checkbox"/> STI counseling</td> </tr> <tr> <td><input type="checkbox"/> Gynecologist</td> <td><input type="checkbox"/> STI treatment</td> </tr> <tr> <td><input type="checkbox"/> HIV care (pre ART or ART)</td> <td><input type="checkbox"/> TB care/treatment</td> </tr> <tr> <td><input type="checkbox"/> HIV counseling</td> <td><input type="checkbox"/> X-ray</td> </tr> <tr> <td><input type="checkbox"/> HIV testing (blood test)</td> <td><input type="checkbox"/> Other (specify): _____</td> </tr> <tr> <td><input type="checkbox"/> Laboratory test</td> <td></td> </tr> </table>                                                                    | <input type="checkbox"/> Ante-natal care            | <input type="checkbox"/> Pap smear     | <input type="checkbox"/> Child immunization    | <input type="checkbox"/> Pharmacy (drugs)     | <input type="checkbox"/> Child welfare    | <input type="checkbox"/> PMTCT     | <input type="checkbox"/> Counseling (general)    | <input type="checkbox"/> PNC for baby (exam) | <input type="checkbox"/> Family planning counseling    | <input type="checkbox"/> PNC for mother (exam) | <input type="checkbox"/> Family planning provision    | <input type="checkbox"/> STI counseling     | <input type="checkbox"/> Gynecologist    | <input type="checkbox"/> STI treatment     | <input type="checkbox"/> HIV care (pre ART or ART)    | <input type="checkbox"/> TB care/treatment     | <input type="checkbox"/> HIV counseling    | <input type="checkbox"/> X-ray     | <input type="checkbox"/> HIV testing (blood test)     | <input type="checkbox"/> Other (specify): _____     | <input type="checkbox"/> Laboratory test     |  | <p><b>2. What is client referred for? (tick all that apply)</b></p> <table style="width:100%; border: none;"> <tr> <td style="width: 50%;"><input type="checkbox"/> Ante-natal care</td> <td style="width: 50%;"><input type="checkbox"/> Pap smear</td> </tr> <tr> <td><input type="checkbox"/> Child immunization</td> <td><input type="checkbox"/> Pharmacy (drugs)</td> </tr> <tr> <td><input type="checkbox"/> Child welfare</td> <td><input type="checkbox"/> PMTCT</td> </tr> <tr> <td><input type="checkbox"/> Counseling (general)</td> <td><input type="checkbox"/> PNC for baby (exam)</td> </tr> <tr> <td><input type="checkbox"/> Family planning counseling</td> <td><input type="checkbox"/> PNC for mother (exam)</td> </tr> <tr> <td><input type="checkbox"/> Family planning provision</td> <td><input type="checkbox"/> STI counseling</td> </tr> <tr> <td><input type="checkbox"/> Gynecologist</td> <td><input type="checkbox"/> STI treatment</td> </tr> <tr> <td><input type="checkbox"/> HIV care (pre ART or ART)</td> <td><input type="checkbox"/> TB care/treatment</td> </tr> <tr> <td><input type="checkbox"/> HIV counseling</td> <td><input type="checkbox"/> X-ray</td> </tr> <tr> <td><input type="checkbox"/> HIV testing (blood test)</td> <td><input type="checkbox"/> Other (specify): _____</td> </tr> <tr> <td><input type="checkbox"/> Laboratory test</td> <td></td> </tr> </table> <p><b>Is this/are these:</b> <input type="checkbox"/> Internal referral(s) <input type="checkbox"/> External referral(s)<br/> <b>If external, where?</b> _____</p> | <input type="checkbox"/> Ante-natal care | <input type="checkbox"/> Pap smear | <input type="checkbox"/> Child immunization | <input type="checkbox"/> Pharmacy (drugs) | <input type="checkbox"/> Child welfare | <input type="checkbox"/> PMTCT | <input type="checkbox"/> Counseling (general) | <input type="checkbox"/> PNC for baby (exam) | <input type="checkbox"/> Family planning counseling | <input type="checkbox"/> PNC for mother (exam) | <input type="checkbox"/> Family planning provision | <input type="checkbox"/> STI counseling | <input type="checkbox"/> Gynecologist | <input type="checkbox"/> STI treatment | <input type="checkbox"/> HIV care (pre ART or ART) | <input type="checkbox"/> TB care/treatment | <input type="checkbox"/> HIV counseling | <input type="checkbox"/> X-ray | <input type="checkbox"/> HIV testing (blood test) | <input type="checkbox"/> Other (specify): _____ | <input type="checkbox"/> Laboratory test |  |
| <input type="checkbox"/> Ante-natal care                                                                                                                                                                                                                                                                                                                                                                                                                                                                                                                                                                                                                                                                                                                                                                                                                                                                                                                                                                                                                                                                                                                                                                                                                                                                                                                                                                                                                                                    | <input type="checkbox"/> Pap smear                  |                                        |                                                |                                               |                                           |                                    |                                                  |                                              |                                                        |                                                |                                                       |                                             |                                          |                                            |                                                       |                                                |                                            |                                    |                                                       |                                                     |                                              |  |                                                                                                                                                                                                                                                                                                                                                                                                                                                                                                                                                                                                                                                                                                                                                                                                                                                                                                                                                                                                                                                                                                                                                                                                                                                                                                                                                                                                                                                                                                                                                                                                 |                                          |                                    |                                             |                                           |                                        |                                |                                               |                                              |                                                     |                                                |                                                    |                                         |                                       |                                        |                                                    |                                            |                                         |                                |                                                   |                                                 |                                          |  |
| <input type="checkbox"/> Child immunization                                                                                                                                                                                                                                                                                                                                                                                                                                                                                                                                                                                                                                                                                                                                                                                                                                                                                                                                                                                                                                                                                                                                                                                                                                                                                                                                                                                                                                                 | <input type="checkbox"/> Pharmacy (drugs)           |                                        |                                                |                                               |                                           |                                    |                                                  |                                              |                                                        |                                                |                                                       |                                             |                                          |                                            |                                                       |                                                |                                            |                                    |                                                       |                                                     |                                              |  |                                                                                                                                                                                                                                                                                                                                                                                                                                                                                                                                                                                                                                                                                                                                                                                                                                                                                                                                                                                                                                                                                                                                                                                                                                                                                                                                                                                                                                                                                                                                                                                                 |                                          |                                    |                                             |                                           |                                        |                                |                                               |                                              |                                                     |                                                |                                                    |                                         |                                       |                                        |                                                    |                                            |                                         |                                |                                                   |                                                 |                                          |  |
| <input type="checkbox"/> Child welfare                                                                                                                                                                                                                                                                                                                                                                                                                                                                                                                                                                                                                                                                                                                                                                                                                                                                                                                                                                                                                                                                                                                                                                                                                                                                                                                                                                                                                                                      | <input type="checkbox"/> PMTCT                      |                                        |                                                |                                               |                                           |                                    |                                                  |                                              |                                                        |                                                |                                                       |                                             |                                          |                                            |                                                       |                                                |                                            |                                    |                                                       |                                                     |                                              |  |                                                                                                                                                                                                                                                                                                                                                                                                                                                                                                                                                                                                                                                                                                                                                                                                                                                                                                                                                                                                                                                                                                                                                                                                                                                                                                                                                                                                                                                                                                                                                                                                 |                                          |                                    |                                             |                                           |                                        |                                |                                               |                                              |                                                     |                                                |                                                    |                                         |                                       |                                        |                                                    |                                            |                                         |                                |                                                   |                                                 |                                          |  |
| <input type="checkbox"/> Counseling (general)                                                                                                                                                                                                                                                                                                                                                                                                                                                                                                                                                                                                                                                                                                                                                                                                                                                                                                                                                                                                                                                                                                                                                                                                                                                                                                                                                                                                                                               | <input type="checkbox"/> PNC for baby (exam)        |                                        |                                                |                                               |                                           |                                    |                                                  |                                              |                                                        |                                                |                                                       |                                             |                                          |                                            |                                                       |                                                |                                            |                                    |                                                       |                                                     |                                              |  |                                                                                                                                                                                                                                                                                                                                                                                                                                                                                                                                                                                                                                                                                                                                                                                                                                                                                                                                                                                                                                                                                                                                                                                                                                                                                                                                                                                                                                                                                                                                                                                                 |                                          |                                    |                                             |                                           |                                        |                                |                                               |                                              |                                                     |                                                |                                                    |                                         |                                       |                                        |                                                    |                                            |                                         |                                |                                                   |                                                 |                                          |  |
| <input type="checkbox"/> Family planning counseling                                                                                                                                                                                                                                                                                                                                                                                                                                                                                                                                                                                                                                                                                                                                                                                                                                                                                                                                                                                                                                                                                                                                                                                                                                                                                                                                                                                                                                         | <input type="checkbox"/> PNC for mother (exam)      |                                        |                                                |                                               |                                           |                                    |                                                  |                                              |                                                        |                                                |                                                       |                                             |                                          |                                            |                                                       |                                                |                                            |                                    |                                                       |                                                     |                                              |  |                                                                                                                                                                                                                                                                                                                                                                                                                                                                                                                                                                                                                                                                                                                                                                                                                                                                                                                                                                                                                                                                                                                                                                                                                                                                                                                                                                                                                                                                                                                                                                                                 |                                          |                                    |                                             |                                           |                                        |                                |                                               |                                              |                                                     |                                                |                                                    |                                         |                                       |                                        |                                                    |                                            |                                         |                                |                                                   |                                                 |                                          |  |
| <input type="checkbox"/> Family planning provision                                                                                                                                                                                                                                                                                                                                                                                                                                                                                                                                                                                                                                                                                                                                                                                                                                                                                                                                                                                                                                                                                                                                                                                                                                                                                                                                                                                                                                          | <input type="checkbox"/> STI counseling             |                                        |                                                |                                               |                                           |                                    |                                                  |                                              |                                                        |                                                |                                                       |                                             |                                          |                                            |                                                       |                                                |                                            |                                    |                                                       |                                                     |                                              |  |                                                                                                                                                                                                                                                                                                                                                                                                                                                                                                                                                                                                                                                                                                                                                                                                                                                                                                                                                                                                                                                                                                                                                                                                                                                                                                                                                                                                                                                                                                                                                                                                 |                                          |                                    |                                             |                                           |                                        |                                |                                               |                                              |                                                     |                                                |                                                    |                                         |                                       |                                        |                                                    |                                            |                                         |                                |                                                   |                                                 |                                          |  |
| <input type="checkbox"/> Gynecologist                                                                                                                                                                                                                                                                                                                                                                                                                                                                                                                                                                                                                                                                                                                                                                                                                                                                                                                                                                                                                                                                                                                                                                                                                                                                                                                                                                                                                                                       | <input type="checkbox"/> STI treatment              |                                        |                                                |                                               |                                           |                                    |                                                  |                                              |                                                        |                                                |                                                       |                                             |                                          |                                            |                                                       |                                                |                                            |                                    |                                                       |                                                     |                                              |  |                                                                                                                                                                                                                                                                                                                                                                                                                                                                                                                                                                                                                                                                                                                                                                                                                                                                                                                                                                                                                                                                                                                                                                                                                                                                                                                                                                                                                                                                                                                                                                                                 |                                          |                                    |                                             |                                           |                                        |                                |                                               |                                              |                                                     |                                                |                                                    |                                         |                                       |                                        |                                                    |                                            |                                         |                                |                                                   |                                                 |                                          |  |
| <input type="checkbox"/> HIV care (pre ART or ART)                                                                                                                                                                                                                                                                                                                                                                                                                                                                                                                                                                                                                                                                                                                                                                                                                                                                                                                                                                                                                                                                                                                                                                                                                                                                                                                                                                                                                                          | <input type="checkbox"/> TB care/treatment          |                                        |                                                |                                               |                                           |                                    |                                                  |                                              |                                                        |                                                |                                                       |                                             |                                          |                                            |                                                       |                                                |                                            |                                    |                                                       |                                                     |                                              |  |                                                                                                                                                                                                                                                                                                                                                                                                                                                                                                                                                                                                                                                                                                                                                                                                                                                                                                                                                                                                                                                                                                                                                                                                                                                                                                                                                                                                                                                                                                                                                                                                 |                                          |                                    |                                             |                                           |                                        |                                |                                               |                                              |                                                     |                                                |                                                    |                                         |                                       |                                        |                                                    |                                            |                                         |                                |                                                   |                                                 |                                          |  |
| <input type="checkbox"/> HIV counseling                                                                                                                                                                                                                                                                                                                                                                                                                                                                                                                                                                                                                                                                                                                                                                                                                                                                                                                                                                                                                                                                                                                                                                                                                                                                                                                                                                                                                                                     | <input type="checkbox"/> X-ray                      |                                        |                                                |                                               |                                           |                                    |                                                  |                                              |                                                        |                                                |                                                       |                                             |                                          |                                            |                                                       |                                                |                                            |                                    |                                                       |                                                     |                                              |  |                                                                                                                                                                                                                                                                                                                                                                                                                                                                                                                                                                                                                                                                                                                                                                                                                                                                                                                                                                                                                                                                                                                                                                                                                                                                                                                                                                                                                                                                                                                                                                                                 |                                          |                                    |                                             |                                           |                                        |                                |                                               |                                              |                                                     |                                                |                                                    |                                         |                                       |                                        |                                                    |                                            |                                         |                                |                                                   |                                                 |                                          |  |
| <input type="checkbox"/> HIV testing (blood test)                                                                                                                                                                                                                                                                                                                                                                                                                                                                                                                                                                                                                                                                                                                                                                                                                                                                                                                                                                                                                                                                                                                                                                                                                                                                                                                                                                                                                                           | <input type="checkbox"/> Other (specify): _____     |                                        |                                                |                                               |                                           |                                    |                                                  |                                              |                                                        |                                                |                                                       |                                             |                                          |                                            |                                                       |                                                |                                            |                                    |                                                       |                                                     |                                              |  |                                                                                                                                                                                                                                                                                                                                                                                                                                                                                                                                                                                                                                                                                                                                                                                                                                                                                                                                                                                                                                                                                                                                                                                                                                                                                                                                                                                                                                                                                                                                                                                                 |                                          |                                    |                                             |                                           |                                        |                                |                                               |                                              |                                                     |                                                |                                                    |                                         |                                       |                                        |                                                    |                                            |                                         |                                |                                                   |                                                 |                                          |  |
| <input type="checkbox"/> Laboratory test                                                                                                                                                                                                                                                                                                                                                                                                                                                                                                                                                                                                                                                                                                                                                                                                                                                                                                                                                                                                                                                                                                                                                                                                                                                                                                                                                                                                                                                    |                                                     |                                        |                                                |                                               |                                           |                                    |                                                  |                                              |                                                        |                                                |                                                       |                                             |                                          |                                            |                                                       |                                                |                                            |                                    |                                                       |                                                     |                                              |  |                                                                                                                                                                                                                                                                                                                                                                                                                                                                                                                                                                                                                                                                                                                                                                                                                                                                                                                                                                                                                                                                                                                                                                                                                                                                                                                                                                                                                                                                                                                                                                                                 |                                          |                                    |                                             |                                           |                                        |                                |                                               |                                              |                                                     |                                                |                                                    |                                         |                                       |                                        |                                                    |                                            |                                         |                                |                                                   |                                                 |                                          |  |
| <input type="checkbox"/> Ante-natal care                                                                                                                                                                                                                                                                                                                                                                                                                                                                                                                                                                                                                                                                                                                                                                                                                                                                                                                                                                                                                                                                                                                                                                                                                                                                                                                                                                                                                                                    | <input type="checkbox"/> Pap smear                  |                                        |                                                |                                               |                                           |                                    |                                                  |                                              |                                                        |                                                |                                                       |                                             |                                          |                                            |                                                       |                                                |                                            |                                    |                                                       |                                                     |                                              |  |                                                                                                                                                                                                                                                                                                                                                                                                                                                                                                                                                                                                                                                                                                                                                                                                                                                                                                                                                                                                                                                                                                                                                                                                                                                                                                                                                                                                                                                                                                                                                                                                 |                                          |                                    |                                             |                                           |                                        |                                |                                               |                                              |                                                     |                                                |                                                    |                                         |                                       |                                        |                                                    |                                            |                                         |                                |                                                   |                                                 |                                          |  |
| <input type="checkbox"/> Child immunization                                                                                                                                                                                                                                                                                                                                                                                                                                                                                                                                                                                                                                                                                                                                                                                                                                                                                                                                                                                                                                                                                                                                                                                                                                                                                                                                                                                                                                                 | <input type="checkbox"/> Pharmacy (drugs)           |                                        |                                                |                                               |                                           |                                    |                                                  |                                              |                                                        |                                                |                                                       |                                             |                                          |                                            |                                                       |                                                |                                            |                                    |                                                       |                                                     |                                              |  |                                                                                                                                                                                                                                                                                                                                                                                                                                                                                                                                                                                                                                                                                                                                                                                                                                                                                                                                                                                                                                                                                                                                                                                                                                                                                                                                                                                                                                                                                                                                                                                                 |                                          |                                    |                                             |                                           |                                        |                                |                                               |                                              |                                                     |                                                |                                                    |                                         |                                       |                                        |                                                    |                                            |                                         |                                |                                                   |                                                 |                                          |  |
| <input type="checkbox"/> Child welfare                                                                                                                                                                                                                                                                                                                                                                                                                                                                                                                                                                                                                                                                                                                                                                                                                                                                                                                                                                                                                                                                                                                                                                                                                                                                                                                                                                                                                                                      | <input type="checkbox"/> PMTCT                      |                                        |                                                |                                               |                                           |                                    |                                                  |                                              |                                                        |                                                |                                                       |                                             |                                          |                                            |                                                       |                                                |                                            |                                    |                                                       |                                                     |                                              |  |                                                                                                                                                                                                                                                                                                                                                                                                                                                                                                                                                                                                                                                                                                                                                                                                                                                                                                                                                                                                                                                                                                                                                                                                                                                                                                                                                                                                                                                                                                                                                                                                 |                                          |                                    |                                             |                                           |                                        |                                |                                               |                                              |                                                     |                                                |                                                    |                                         |                                       |                                        |                                                    |                                            |                                         |                                |                                                   |                                                 |                                          |  |
| <input type="checkbox"/> Counseling (general)                                                                                                                                                                                                                                                                                                                                                                                                                                                                                                                                                                                                                                                                                                                                                                                                                                                                                                                                                                                                                                                                                                                                                                                                                                                                                                                                                                                                                                               | <input type="checkbox"/> PNC for baby (exam)        |                                        |                                                |                                               |                                           |                                    |                                                  |                                              |                                                        |                                                |                                                       |                                             |                                          |                                            |                                                       |                                                |                                            |                                    |                                                       |                                                     |                                              |  |                                                                                                                                                                                                                                                                                                                                                                                                                                                                                                                                                                                                                                                                                                                                                                                                                                                                                                                                                                                                                                                                                                                                                                                                                                                                                                                                                                                                                                                                                                                                                                                                 |                                          |                                    |                                             |                                           |                                        |                                |                                               |                                              |                                                     |                                                |                                                    |                                         |                                       |                                        |                                                    |                                            |                                         |                                |                                                   |                                                 |                                          |  |
| <input type="checkbox"/> Family planning counseling                                                                                                                                                                                                                                                                                                                                                                                                                                                                                                                                                                                                                                                                                                                                                                                                                                                                                                                                                                                                                                                                                                                                                                                                                                                                                                                                                                                                                                         | <input type="checkbox"/> PNC for mother (exam)      |                                        |                                                |                                               |                                           |                                    |                                                  |                                              |                                                        |                                                |                                                       |                                             |                                          |                                            |                                                       |                                                |                                            |                                    |                                                       |                                                     |                                              |  |                                                                                                                                                                                                                                                                                                                                                                                                                                                                                                                                                                                                                                                                                                                                                                                                                                                                                                                                                                                                                                                                                                                                                                                                                                                                                                                                                                                                                                                                                                                                                                                                 |                                          |                                    |                                             |                                           |                                        |                                |                                               |                                              |                                                     |                                                |                                                    |                                         |                                       |                                        |                                                    |                                            |                                         |                                |                                                   |                                                 |                                          |  |
| <input type="checkbox"/> Family planning provision                                                                                                                                                                                                                                                                                                                                                                                                                                                                                                                                                                                                                                                                                                                                                                                                                                                                                                                                                                                                                                                                                                                                                                                                                                                                                                                                                                                                                                          | <input type="checkbox"/> STI counseling             |                                        |                                                |                                               |                                           |                                    |                                                  |                                              |                                                        |                                                |                                                       |                                             |                                          |                                            |                                                       |                                                |                                            |                                    |                                                       |                                                     |                                              |  |                                                                                                                                                                                                                                                                                                                                                                                                                                                                                                                                                                                                                                                                                                                                                                                                                                                                                                                                                                                                                                                                                                                                                                                                                                                                                                                                                                                                                                                                                                                                                                                                 |                                          |                                    |                                             |                                           |                                        |                                |                                               |                                              |                                                     |                                                |                                                    |                                         |                                       |                                        |                                                    |                                            |                                         |                                |                                                   |                                                 |                                          |  |
| <input type="checkbox"/> Gynecologist                                                                                                                                                                                                                                                                                                                                                                                                                                                                                                                                                                                                                                                                                                                                                                                                                                                                                                                                                                                                                                                                                                                                                                                                                                                                                                                                                                                                                                                       | <input type="checkbox"/> STI treatment              |                                        |                                                |                                               |                                           |                                    |                                                  |                                              |                                                        |                                                |                                                       |                                             |                                          |                                            |                                                       |                                                |                                            |                                    |                                                       |                                                     |                                              |  |                                                                                                                                                                                                                                                                                                                                                                                                                                                                                                                                                                                                                                                                                                                                                                                                                                                                                                                                                                                                                                                                                                                                                                                                                                                                                                                                                                                                                                                                                                                                                                                                 |                                          |                                    |                                             |                                           |                                        |                                |                                               |                                              |                                                     |                                                |                                                    |                                         |                                       |                                        |                                                    |                                            |                                         |                                |                                                   |                                                 |                                          |  |
| <input type="checkbox"/> HIV care (pre ART or ART)                                                                                                                                                                                                                                                                                                                                                                                                                                                                                                                                                                                                                                                                                                                                                                                                                                                                                                                                                                                                                                                                                                                                                                                                                                                                                                                                                                                                                                          | <input type="checkbox"/> TB care/treatment          |                                        |                                                |                                               |                                           |                                    |                                                  |                                              |                                                        |                                                |                                                       |                                             |                                          |                                            |                                                       |                                                |                                            |                                    |                                                       |                                                     |                                              |  |                                                                                                                                                                                                                                                                                                                                                                                                                                                                                                                                                                                                                                                                                                                                                                                                                                                                                                                                                                                                                                                                                                                                                                                                                                                                                                                                                                                                                                                                                                                                                                                                 |                                          |                                    |                                             |                                           |                                        |                                |                                               |                                              |                                                     |                                                |                                                    |                                         |                                       |                                        |                                                    |                                            |                                         |                                |                                                   |                                                 |                                          |  |
| <input type="checkbox"/> HIV counseling                                                                                                                                                                                                                                                                                                                                                                                                                                                                                                                                                                                                                                                                                                                                                                                                                                                                                                                                                                                                                                                                                                                                                                                                                                                                                                                                                                                                                                                     | <input type="checkbox"/> X-ray                      |                                        |                                                |                                               |                                           |                                    |                                                  |                                              |                                                        |                                                |                                                       |                                             |                                          |                                            |                                                       |                                                |                                            |                                    |                                                       |                                                     |                                              |  |                                                                                                                                                                                                                                                                                                                                                                                                                                                                                                                                                                                                                                                                                                                                                                                                                                                                                                                                                                                                                                                                                                                                                                                                                                                                                                                                                                                                                                                                                                                                                                                                 |                                          |                                    |                                             |                                           |                                        |                                |                                               |                                              |                                                     |                                                |                                                    |                                         |                                       |                                        |                                                    |                                            |                                         |                                |                                                   |                                                 |                                          |  |
| <input type="checkbox"/> HIV testing (blood test)                                                                                                                                                                                                                                                                                                                                                                                                                                                                                                                                                                                                                                                                                                                                                                                                                                                                                                                                                                                                                                                                                                                                                                                                                                                                                                                                                                                                                                           | <input type="checkbox"/> Other (specify): _____     |                                        |                                                |                                               |                                           |                                    |                                                  |                                              |                                                        |                                                |                                                       |                                             |                                          |                                            |                                                       |                                                |                                            |                                    |                                                       |                                                     |                                              |  |                                                                                                                                                                                                                                                                                                                                                                                                                                                                                                                                                                                                                                                                                                                                                                                                                                                                                                                                                                                                                                                                                                                                                                                                                                                                                                                                                                                                                                                                                                                                                                                                 |                                          |                                    |                                             |                                           |                                        |                                |                                               |                                              |                                                     |                                                |                                                    |                                         |                                       |                                        |                                                    |                                            |                                         |                                |                                                   |                                                 |                                          |  |
| <input type="checkbox"/> Laboratory test                                                                                                                                                                                                                                                                                                                                                                                                                                                                                                                                                                                                                                                                                                                                                                                                                                                                                                                                                                                                                                                                                                                                                                                                                                                                                                                                                                                                                                                    |                                                     |                                        |                                                |                                               |                                           |                                    |                                                  |                                              |                                                        |                                                |                                                       |                                             |                                          |                                            |                                                       |                                                |                                            |                                    |                                                       |                                                     |                                              |  |                                                                                                                                                                                                                                                                                                                                                                                                                                                                                                                                                                                                                                                                                                                                                                                                                                                                                                                                                                                                                                                                                                                                                                                                                                                                                                                                                                                                                                                                                                                                                                                                 |                                          |                                    |                                             |                                           |                                        |                                |                                               |                                              |                                                     |                                                |                                                    |                                         |                                       |                                        |                                                    |                                            |                                         |                                |                                                   |                                                 |                                          |  |

**3<sup>rd</sup> Provider seen:**

**Consultation start time:**   :

**Consultation end time:**   :

**1. What is client seen for? (tick all that apply)**

- |                                                     |                                                 |
|-----------------------------------------------------|-------------------------------------------------|
| <input type="checkbox"/> Ante-natal care            | <input type="checkbox"/> Pap smear              |
| <input type="checkbox"/> Child immunization         | <input type="checkbox"/> Pharmacy (drugs)       |
| <input type="checkbox"/> Child welfare              | <input type="checkbox"/> PMTCT                  |
| <input type="checkbox"/> Counseling (general)       | <input type="checkbox"/> PNC for baby (exam)    |
| <input type="checkbox"/> Family planning counseling | <input type="checkbox"/> PNC for mother (exam)  |
| <input type="checkbox"/> Family planning provision  | <input type="checkbox"/> STI counseling         |
| <input type="checkbox"/> Gynecologist               | <input type="checkbox"/> STI treatment          |
| <input type="checkbox"/> HIV care (pre ART or ART)  | <input type="checkbox"/> TB care/treatment      |
| <input type="checkbox"/> HIV counseling             | <input type="checkbox"/> X-ray                  |
| <input type="checkbox"/> HIV testing (blood test)   | <input type="checkbox"/> Other (specify): _____ |
| <input type="checkbox"/> Laboratory test            |                                                 |

**2. What is client referred for? (tick all that apply)**

- |                                                     |                                                 |
|-----------------------------------------------------|-------------------------------------------------|
| <input type="checkbox"/> Ante-natal care            | <input type="checkbox"/> Pap smear              |
| <input type="checkbox"/> Child immunization         | <input type="checkbox"/> Pharmacy (drugs)       |
| <input type="checkbox"/> Child welfare              | <input type="checkbox"/> PMTCT                  |
| <input type="checkbox"/> Counseling (general)       | <input type="checkbox"/> PNC for baby (exam)    |
| <input type="checkbox"/> Family planning counseling | <input type="checkbox"/> PNC for mother (exam)  |
| <input type="checkbox"/> Family planning provision  | <input type="checkbox"/> STI counseling         |
| <input type="checkbox"/> Gynecologist               | <input type="checkbox"/> STI treatment          |
| <input type="checkbox"/> HIV care (pre ART or ART)  | <input type="checkbox"/> TB care/treatment      |
| <input type="checkbox"/> HIV counseling             | <input type="checkbox"/> X-ray                  |
| <input type="checkbox"/> HIV testing (blood test)   | <input type="checkbox"/> Other (specify): _____ |
| <input type="checkbox"/> Laboratory test            |                                                 |

**Is this/are these:**  Internal referral(s)  External referral(s)  
**If external, where?** \_\_\_\_\_

**4<sup>th</sup> Provider seen:**

**Consultation start time:**   :

**Consultation end time:**   :

**1. What is client seen for? (tick all that apply)**

- |                                                     |                                                 |
|-----------------------------------------------------|-------------------------------------------------|
| <input type="checkbox"/> Ante-natal care            | <input type="checkbox"/> Pap smear              |
| <input type="checkbox"/> Child immunization         | <input type="checkbox"/> Pharmacy (drugs)       |
| <input type="checkbox"/> Child welfare              | <input type="checkbox"/> PMTCT                  |
| <input type="checkbox"/> Counseling (general)       | <input type="checkbox"/> PNC for baby (exam)    |
| <input type="checkbox"/> Family planning counseling | <input type="checkbox"/> PNC for mother (exam)  |
| <input type="checkbox"/> Family planning provision  | <input type="checkbox"/> STI counseling         |
| <input type="checkbox"/> Gynecologist               | <input type="checkbox"/> STI treatment          |
| <input type="checkbox"/> HIV care (pre ART or ART)  | <input type="checkbox"/> TB care/treatment      |
| <input type="checkbox"/> HIV counseling             | <input type="checkbox"/> X-ray                  |
| <input type="checkbox"/> HIV testing (blood test)   | <input type="checkbox"/> Other (specify): _____ |
| <input type="checkbox"/> Laboratory test            |                                                 |

**2. What is client referred for? (tick all that apply)**

- |                                                     |                                                 |
|-----------------------------------------------------|-------------------------------------------------|
| <input type="checkbox"/> Ante-natal care            | <input type="checkbox"/> Pap smear              |
| <input type="checkbox"/> Child immunization         | <input type="checkbox"/> Pharmacy (drugs)       |
| <input type="checkbox"/> Child welfare              | <input type="checkbox"/> PMTCT                  |
| <input type="checkbox"/> Counseling (general)       | <input type="checkbox"/> PNC for baby (exam)    |
| <input type="checkbox"/> Family planning counseling | <input type="checkbox"/> PNC for mother (exam)  |
| <input type="checkbox"/> Family planning provision  | <input type="checkbox"/> STI counseling         |
| <input type="checkbox"/> Gynecologist               | <input type="checkbox"/> STI treatment          |
| <input type="checkbox"/> HIV care (pre ART or ART)  | <input type="checkbox"/> TB care/treatment      |
| <input type="checkbox"/> HIV counseling             | <input type="checkbox"/> X-ray                  |
| <input type="checkbox"/> HIV testing (blood test)   | <input type="checkbox"/> Other (specify): _____ |
| <input type="checkbox"/> Laboratory test            |                                                 |

**Is this/are these:**  Internal referral(s)  External referral(s)  
**If external, where?** \_\_\_\_\_

**5<sup>th</sup> Provider seen:**

**Consultation start time:**   :

**Consultation end time:**   :

**1. What is client seen for? (tick all that apply)**

- |                                                     |                                                 |
|-----------------------------------------------------|-------------------------------------------------|
| <input type="checkbox"/> Ante-natal care            | <input type="checkbox"/> Pap smear              |
| <input type="checkbox"/> Child immunization         | <input type="checkbox"/> Pharmacy (drugs)       |
| <input type="checkbox"/> Child welfare              | <input type="checkbox"/> PMTCT                  |
| <input type="checkbox"/> Counseling (general)       | <input type="checkbox"/> PNC for baby (exam)    |
| <input type="checkbox"/> Family planning counseling | <input type="checkbox"/> PNC for mother (exam)  |
| <input type="checkbox"/> Family planning provision  | <input type="checkbox"/> STI counseling         |
| <input type="checkbox"/> Gynaecologist              | <input type="checkbox"/> STI treatment          |
| <input type="checkbox"/> HIV care (pre ART or ART)  | <input type="checkbox"/> TB care/treatment      |
| <input type="checkbox"/> HIV counseling             | <input type="checkbox"/> X-ray                  |
| <input type="checkbox"/> HIV testing (blood test)   | <input type="checkbox"/> Other (specify): _____ |
| <input type="checkbox"/> Laboratory test            |                                                 |

**2. What is client referred for? (tick all that apply)**

- |                                                     |                                                 |
|-----------------------------------------------------|-------------------------------------------------|
| <input type="checkbox"/> Ante-natal care            | <input type="checkbox"/> Pap smear              |
| <input type="checkbox"/> Child immunization         | <input type="checkbox"/> Pharmacy (drugs)       |
| <input type="checkbox"/> Child welfare              | <input type="checkbox"/> PMTCT                  |
| <input type="checkbox"/> Counseling (general)       | <input type="checkbox"/> PNC for baby (exam)    |
| <input type="checkbox"/> Family planning counseling | <input type="checkbox"/> PNC for mother (exam)  |
| <input type="checkbox"/> Family planning provision  | <input type="checkbox"/> STI counseling         |
| <input type="checkbox"/> Gynecologist               | <input type="checkbox"/> STI treatment          |
| <input type="checkbox"/> HIV care (pre ART or ART)  | <input type="checkbox"/> TB care/treatment      |
| <input type="checkbox"/> HIV counseling             | <input type="checkbox"/> X-ray                  |
| <input type="checkbox"/> HIV testing (blood test)   | <input type="checkbox"/> Other (specify): _____ |
| <input type="checkbox"/> Laboratory test            |                                                 |

**Is this/are these:**  Internal referral(s)  External referral(s)  
**If external, where?** \_\_\_\_\_

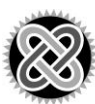

**Integra**

Strengthening the evidence base  
for integrating HIV and SRH services
