# Supplementary material for: Integration of HIV and reproductive health services in public sector facilities: analysis of client flow data over time in Kenya
Source: PubMed Central journal article supplement (PMC6144905; doi:10.1136/bmjgh-2018-000867), 2018-09-14
Supplement: bmjgh-2018-000867supp002.pdf [file bmjgh-2018-000867supp002.pdf]

Supplemental Table 1. Dates of data collection in Eastern province (HIV-PNC model)

| Round      | Q    | unknown | 06 Jul    | 07 Jul    | 08 Jul    | 09 Jul | 10 Jul | 13 Jul | 14 Jul | 15 Jul | 16 Jul | 17 Jul |        |        |        |        |           |        |        |  |
|------------|------|---------|-----------|-----------|-----------|--------|--------|--------|--------|--------|--------|--------|--------|--------|--------|--------|-----------|--------|--------|--|
| Facility A | 2009 | 82      | 72        | 86        | 92        | 58     |        |        |        |        |        |        |        |        |        |        |           |        |        |  |
| Facility B | 51   | 14      | 12        | 58        | 74        |        |        |        |        |        |        |        |        |        |        |        |           |        |        |  |
| Facility C | 8    | 18      | 24        | 19        | 20        |        |        |        |        |        |        |        |        |        |        |        |           |        |        |  |
| Facility D | 55   | 9       | 8         | 53        | 10        |        |        |        |        |        |        |        |        |        |        |        |           |        |        |  |
| Facility E | 20   | 45      | 15        | 21        | 5         |        |        |        |        |        |        |        |        |        |        |        |           |        |        |  |
| Facility F | 14   | 19      | 17        | 23        | 27        |        |        |        |        |        |        |        |        |        |        |        |           |        |        |  |
| Facility G |      |         |           |           |           | 45     | 29     | 63     | 26     | 39     |        |        |        |        |        |        |           |        |        |  |
| Facility H |      |         |           |           |           | 45     | 67     | 42     | 38     | 43     |        |        |        |        |        |        |           |        |        |  |
| Facility I |      |         |           |           |           | 21     | 29     | 31     | 15     | 19     |        |        |        |        |        |        |           |        |        |  |
| Facility J |      |         |           |           |           | 18     | 24     | 14     | 14     | 17     |        |        |        |        |        |        |           |        |        |  |
| Facility K |      |         |           |           |           | 31     | 54     | 51     | 24     | 61     |        |        |        |        |        |        |           |        |        |  |
| Facility L |      |         |           |           |           | 16     | 8      | 49     | 15     | 19     |        |        |        |        |        |        |           |        |        |  |
| unknown    |      | 1       |           |           |           |        |        |        |        |        |        |        |        |        |        |        |           |        |        |  |
| Round 2    | Q    | unknown | 26apr1980 | 22jan1990 | 25oct2001 | 05 Jan | 18 Jan | 19 Jan | 20 Jan | 21 Jan | 22 Jan | 25 Jan | 26 Jan | 27 Jan | 28 Jan | 29 Jan | 29Jan2016 |        |        |  |
| Facility A | 1    |         |           |           |           |        | 47     | 3      | 3      | 5      | 42     | 35     | 47     | 26     | 51     | 35     |           |        |        |  |
| Facility B |      |         |           |           |           |        | 21     | 25     | 13     | 16     | 6      |        |        |        |        |        |           |        |        |  |
| Facility C |      |         |           | 1         | 1         |        |        |        |        |        |        | 42     | 28     | 8      | 46     | 11     |           |        |        |  |
| Facility D |      |         |           |           |           |        |        |        |        |        |        | 22     | 45     | 14     | 27     | 26     |           |        |        |  |
| Facility E |      |         |           |           |           |        |        |        |        |        |        |        |        |        |        |        |           |        |        |  |
| Facility F |      |         |           |           |           |        | 33     | 20     | 12     | 23     | 29     |        |        |        |        |        |           |        |        |  |
| Facility G |      |         |           |           |           |        | 48     | 34     | 55     | 16     | 33     |        |        |        |        |        |           |        |        |  |
| Facility H |      |         |           |           |           |        |        |        |        |        |        | 34     | 44     | 34     | 38     | 32     |           |        |        |  |
| Facility I |      |         |           |           |           |        | 14     | 32     | 36     | 29     | 42     |        |        |        |        |        |           |        |        |  |
| Facility J |      |         |           |           |           |        |        |        |        |        |        | 25     | 26     | 28     | 24     | 22     | 1         |        |        |  |
| Facility K |      |         |           |           |           |        |        |        |        |        |        | 43     | 18     | 28     | 14     | 43     |           |        |        |  |
| Facility L |      |         |           |           |           |        | 29     | 24     | 30     | 23     | 19     |        |        |        |        |        |           |        |        |  |
| Round 3    | Q    | unknown | 21 Jun    | 22 Jun    | 23 Jun    | 24 Jun | 25 Jun | 26 Jun | 27 Jun | 28 Jun | 29 Jun | 30 Jun | 01 Jul | 02 Jul | 05 Jul | 06 Jul | 07 Jul    | 08 Jul | 09 Jul |  |
| Facility A | 29   | 49      | 45        | 52        | 26        |        |        |        |        |        |        |        |        |        |        |        |           |        |        |  |
| Facility B | 24   | 6       | 7         | 4         | 35        |        |        |        |        |        |        |        |        |        |        |        |           |        |        |  |
| Facility C | 4    | 26      | 16        | 30        |           |        |        |        |        |        |        |        |        |        |        |        |           |        |        |  |
| Facility D |      |         |           |           |           |        |        |        |        | 35     | 12     | 6      | 24     | 26     |        |        |           |        |        |  |
| Facility E |      |         |           |           |           |        |        |        |        | 45     | 25     | 30     | 23     | 8      |        |        |           |        |        |  |
| Facility F | 1    | 34      | 17        | 15        | 10        | 10     |        |        |        |        |        |        |        |        |        |        |           |        |        |  |
| Facility G |      |         |           |           |           |        |        |        | 1      | 65     | 32     | 45     | 39     | 54     |        |        |           |        |        |  |
| Facility H |      |         |           |           |           |        |        |        |        | 19     | 41     | 10     | 17     | 19     |        |        |           |        |        |  |
| Facility I |      | 31      | 15        | 23        | 20        | 23     |        |        |        |        |        |        |        |        |        |        |           |        |        |  |
| Facility J |      |         |           |           |           |        |        |        |        | 29     | 14     | 17     | 18     | 31     |        |        |           |        |        |  |
| Facility K |      |         |           |           |           |        |        |        |        | 43     | 23     | 22     | 17     | 12     |        |        |           |        |        |  |
| Facility L |      | 2       | 5         | 14        | 11        | 6      |        |        |        |        |        |        |        |        |        |        |           |        |        |  |
| Round 4    | Q    | unknown | 24 Jan    | 25 Jan    | 26 Jan    | 27 Jan | 28 Jan | 31 Jan | 01 Feb | 02 Feb | 03 Feb | 04 Feb | 07 Feb | 08 Feb | 09 Feb | 10 Feb | 11 Feb    |        |        |  |
| Facility A | 108  | 45      | 47        | 63        | 36        |        |        | 1      |        |        |        |        |        |        |        |        |           |        |        |  |
| Facility B | 13   | 8       | 10        | 9         | 66        |        |        |        |        |        |        |        |        |        |        |        |           |        |        |  |
| Facility C |      |         |           |           |           |        |        |        | 31     |        |        | 24     | 1      |        |        |        |           |        |        |  |
| Facility D | 1    | 66      | 3         | 6         | 37        | 23     |        |        |        |        |        |        |        |        |        |        |           |        |        |  |
| Facility E |      |         |           |           |           |        |        | 49     | 29     | 11     |        |        |        |        |        |        |           |        |        |  |
| Facility F | 27   | 26      | 13        | 18        | 56        |        |        |        |        |        |        |        |        |        |        |        |           |        |        |  |
| Facility G |      |         |           |           |           |        |        | 72     | 97     | 57     | 69     | 91     |        |        |        |        |           |        |        |  |
| Facility H | 38   | 47      | 28        | 32        | 49        |        |        |        |        |        |        |        |        |        |        |        |           |        |        |  |
| Facility I |      |         |           |           |           |        |        | 48     | 22     | 18     | 18     | 19     |        |        |        |        |           |        |        |  |
| Facility J |      |         |           |           |           |        |        | 12     | 17     | 19     | 24     | 22     |        |        |        |        |           |        |        |  |
| Facility K |      |         |           |           |           |        |        |        |        |        |        |        | 50     | 57     | 26     | 56     | 58        |        |        |  |
| Facility L |      |         |           |           |           |        |        | 10     | 8      | 13     | 6      | 15     |        |        |        |        |           |        |        |  |
| Round 5    | Q    | unknown | 01 Aug    | 02 Aug    | 03 Aug    | 04 Aug | 05 Aug | 06 Aug | 08 Aug | 09 Aug | 10 Aug | 11 Aug | 12 Aug | 15 Aug | 16 Aug | 17 Aug | 18 Aug    | 19 Aug |        |  |
| Facility A | 1    |         |           |           |           |        |        |        |        |        |        |        |        |        |        |        |           |        |        |  |
| Facility B |      |         |           |           |           |        |        |        |        |        |        |        |        |        | 56     | 12     | 12        | 21     | 72     |  |
| Facility C |      |         |           |           |           |        |        |        |        | 1      | 28     | 4      | 24     | 7      |        |        |           |        |        |  |
| Facility D | 52   | 8       | 4         | 39        | 6         |        |        |        |        |        |        |        |        |        |        |        |           |        |        |  |
| Facility E |      |         |           |           |           |        |        |        |        | 10     | 19     | 20     | 26     | 25     |        |        |           |        |        |  |
| Facility F | 18   | 13      | 15        | 14        | 9         |        |        |        |        | 69     | 51     | 48     | 66     | 67     |        |        |           |        |        |  |
| Facility G |      |         |           |           |           |        |        |        |        |        |        |        |        |        |        |        |           |        |        |  |
| Facility H | 17   | 47      | 20        | 15        | 31        |        |        |        |        |        |        |        |        |        |        |        |           |        |        |  |
| Facility I |      |         |           |           |           |        |        |        |        | 27     | 28     | 11     | 8      | 13     |        |        |           |        |        |  |
| Facility J | 10   | 8       | 10        | 32        | 10        |        |        |        |        |        |        |        |        |        |        |        |           |        |        |  |
| Facility K |      |         |           |           |           |        |        |        |        |        |        |        |        |        | 26     | 38     | 20        | 55     | 33     |  |
| Facility L |      |         |           |           |           |        |        | 1      | 7      | 17     | 5      | 8      |        |        |        |        |           |        |        |  |
| Round 6    | Q    | unknown | 16 Jan    | 17 Jan    | 18 Jan    | 19 Jan | 20 Jan | 23 Jan | 24 Jan | 25 Jan | 26 Jan | 27 Jan | 28 Jan | 30 Jan | 31 Jan | 01 Feb | 02 Feb    | 03 Feb |        |  |
| Facility A |      |         |           |           |           |        |        |        |        |        |        |        |        | 53     | 52     | 32     | 48        | 61     |        |  |
| Facility B | 17   | 24      | 7         | 14        | 42        |        |        |        |        |        |        |        |        |        |        |        |           |        |        |  |
| Facility C | 2    | 35      |           | 31        | 4         |        |        |        |        |        |        |        |        |        |        |        |           |        |        |  |
| Facility D |      |         |           |           |           |        |        |        |        |        |        |        |        | 36     | 6      | 2      | 24        | 8      |        |  |
| Facility E |      |         |           |           |           |        |        | 29     | 43     | 23     | 15     | 24     |        |        |        |        |           |        |        |  |
| Facility F |      |         |           |           |           |        |        |        |        |        |        |        |        | 37     | 15     | 7      | 22        | 20     |        |  |
| Facility G |      |         |           |           |           |        |        |        |        |        |        |        |        | 63     | 66     | 64     | 67        | 56     |        |  |
| Facility H |      |         |           |           |           |        |        |        |        |        |        |        |        | 29     | 28     | 42     | 15        | 17     |        |  |
| Facility I |      |         |           |           |           |        |        |        |        |        |        |        |        | 36     | 13     | 11     | 16        | 21     |        |  |
| Facility J |      |         |           |           |           |        |        | 29     | 14     | 18     | 9      | 9      | 1      |        |        |        |           |        |        |  |
| Facility K |      |         |           |           |           |        |        | 28     | 51     | 17     | 19     | 26     |        |        |        |        |           |        |        |  |
| Facility L |      |         |           |           |           |        |        |        |        |        |        |        |        | 22     | 8      | 11     | 11        | 10     |        |  |

KEY  
 Mondays  
 Date included in analyses  
 Date omitted from analyses
