# Supplementary material for: Integration of HIV and reproductive health services in public sector facilities: analysis of client flow data over time in Kenya
Source: PubMed Central journal article supplement (PMC6144905; doi:10.1136/bmjgh-2018-000867), 2018-09-14
Supplement: bmjgh-2018-000867supp003.pdf [file bmjgh-2018-000867supp003.pdf]

**Supplemental Table 2. Dates of data collection in Central province (HIV-FP model)**

**KEY**  
 Mondays  
 Date included in analyses  
 Date omitted from analyses

| Round 1 (2009 Q) | unknown | 17 Jun | 18 Jun | 19 Jun | 22 Jun | 23 Jun | 24 Jun | 26 Jun | 29 Jun | 30 Jun | 01 Jul | 02 Jul |        |        |        |        |        |        |
|------------------|---------|--------|--------|--------|--------|--------|--------|--------|--------|--------|--------|--------|--------|--------|--------|--------|--------|--------|
| Facility a       |         | 15     | 69     | 52     | 69     | 66     | 70     |        |        |        |        |        |        |        |        |        |        |        |
| Facility b       |         | 49     | 61     | 72     | 69     | 47     | 69     |        |        |        |        |        |        |        |        |        |        |        |
| Facility c       |         | 66     | 49     | 47     | 33     | 41     | 20     |        |        |        |        |        |        |        |        |        |        |        |
| Facility d       |         | 51     | 55     | 61     | 52     | 53     | 56     |        |        |        |        |        |        |        |        |        |        |        |
| Facility e       |         |        | 35     | 46     | 69     | 50     | 50     |        |        |        |        |        |        |        |        |        |        |        |
| Facility f       |         | 31     | 66     | 41     | 54     | 65     | 54     |        |        |        |        |        |        |        |        |        |        |        |
| Facility g       |         |        |        |        |        |        |        | 7      | 56     | 63     | 65     |        |        |        |        |        |        |        |
| Facility h       |         |        |        |        |        |        |        | 55     | 41     | 37     | 48     | 37     |        |        |        |        |        |        |
| Facility i       |         |        |        |        |        |        |        | 28     | 37     | 20     | 25     | 29     |        |        |        |        |        |        |
| Facility j       |         |        |        |        |        |        |        | 23     | 44     | 22     | 14     | 23     |        |        |        |        |        |        |
| Facility k       |         |        |        |        |        |        |        | 67     | 52     | 31     | 50     | 30     |        |        |        |        |        |        |
| Facility l       |         |        |        |        |        |        |        | 43     | 46     | 25     | 33     | 22     |        |        |        |        |        |        |
| Facility m       | 1       |        |        |        |        |        |        |        |        |        |        |        |        |        |        |        |        |        |
| Round 2 (2010 Q) | unknown | 18 Jan | 19 Jan | 20 Jan | 21 Jan | 22 Jan | 25 Jan | 26 Jan | 27 Jan | 28 Jan | 29 Jan | 18 Oct | 28 Nov |        |        |        |        |        |
| Facility a       |         | 2      | 28     | 57     | 48     | 51     | 52     |        |        |        |        |        |        |        |        |        |        |        |
| Facility b       |         |        |        |        |        |        | 55     | 56     | 50     | 54     | 44     |        |        |        |        |        |        |        |
| Facility c       |         |        |        |        |        |        | 24     | 49     | 51     | 55     | 53     |        |        |        |        |        |        |        |
| Facility d       |         |        | 50     | 70     | 28     | 35     | 52     |        |        |        |        | 1      |        |        |        |        |        |        |
| Facility e       |         |        |        |        |        |        | 30     | 23     | 13     | 32     | 22     |        |        |        |        |        |        |        |
| Facility f       |         |        | 29     | 45     | 20     | 10     | 22     |        |        |        |        |        |        |        |        |        |        |        |
| Facility g       |         |        | 46     | 56     | 55     | 64     | 36     |        |        |        |        |        |        |        |        |        |        |        |
| Facility h       |         |        |        |        |        |        | 17     | 48     | 54     | 72     | 60     |        |        |        |        |        |        |        |
| Facility i       |         |        |        |        |        |        | 12     | 10     | 14     | 3      | 29     |        |        |        |        |        |        |        |
| Facility j       |         |        | 46     | 24     | 21     | 33     | 30     |        |        |        |        | 1      |        |        |        |        |        |        |
| Facility k       |         |        | 39     | 17     | 38     | 22     | 15     |        |        |        |        |        |        |        |        |        |        |        |
| Facility l       |         |        |        |        |        |        | 37     | 43     | 21     | 40     | 12     |        |        |        |        |        |        |        |
| Round 3 (2010 Q) | unknown | 21 Apr | 20 Jun | 21 Jun | 22 Jun | 23 Jun | 24 Jun | 25 Jun | 26 Jun | 28 Jun | 29 Jun | 30 Jun | 01 Jul | 02 Jul |        |        |        |        |
| Facility a       |         |        |        |        |        |        |        |        |        | 17     | 53     | 56     | 81     | 73     |        |        |        |        |
| Facility b       |         |        |        | 70     | 25     | 71     | 60     | 24     | 1      |        |        |        |        |        |        |        |        |        |
| Facility c       |         |        |        | 50     | 41     | 50     | 43     | 40     |        |        |        |        |        |        |        |        |        |        |
| Facility d       |         |        |        | 33     | 63     | 9      | 33     | 56     |        |        |        |        |        |        |        |        |        |        |
| Facility e       |         |        |        |        |        |        |        |        |        | 26     | 30     | 6      | 20     | 21     |        |        |        |        |
| Facility f       |         |        |        |        |        |        |        |        |        | 29     | 31     | 27     | 29     | 22     |        |        |        |        |
| Facility g       |         | 7      | 1      |        | 45     | 49     | 60     | 46     | 40     | 1      |        |        |        |        |        |        |        |        |
| Facility h       |         | 3      |        |        |        |        |        |        |        | 54     | 50     | 25     | 50     | 56     |        |        |        |        |
| Facility i       |         |        | 1      |        |        |        |        |        |        | 49     | 14     | 29     | 39     | 47     |        |        |        |        |
| Facility j       |         |        |        | 34     | 30     | 18     | 23     | 29     |        |        |        |        |        |        |        |        |        |        |
| Facility k       |         | 1      |        | 28     | 28     | 42     | 19     | 26     |        |        |        |        |        |        |        |        |        |        |
| Facility l       |         |        |        |        |        |        |        |        |        | 38     | 24     | 28     | 43     | 29     |        |        |        |        |
| Round 4 (2011 Q) | unknown | 21 Jan | 24 Jan | 25 Jan | 26 Jan | 27 Jan | 28 Jan | 31 Jan | 01 Feb | 02 Feb | 03 Feb | 04 Feb | 09 Feb | 10 Feb | 11 Feb |        |        |        |
| Facility a       |         | 2      |        |        |        |        |        | 36     | 100    | 88     | 87     | 92     |        |        |        |        |        |        |
| Facility b       |         |        | 60     | 60     | 71     | 84     | 45     |        |        |        |        |        |        |        |        |        |        |        |
| Facility c       |         |        | 23     | 76     | 46     | 76     | 47     |        |        |        |        |        |        |        |        |        |        |        |
| Facility d       |         |        | 8      | 57     | 15     | 85     | 35     |        |        |        |        |        |        |        |        |        |        |        |
| Facility e       |         |        |        |        |        |        |        | 24     | 29     | 16     | 20     | 19     |        |        |        |        |        |        |
| Facility f       |         |        |        |        |        |        |        | 31     | 23     | 39     | 3      | 21     |        |        |        |        |        |        |
| Facility g       |         | 1      |        |        | 2      |        |        |        |        |        |        |        | 4      | 64     | 70     |        |        |        |
| Facility h       |         | 2      |        | 57     | 63     | 68     | 77     |        |        |        |        |        |        |        |        |        |        |        |
| Facility i       |         |        |        |        |        |        |        | 39     | 21     | 20     | 34     | 43     |        |        |        |        |        |        |
| Facility j       |         |        | 74     |        | 60     | 26     | 37     |        |        |        |        |        |        |        |        |        |        |        |
| Facility k       |         |        | 16     | 24     | 53     | 14     | 28     |        |        |        |        |        |        |        |        |        |        |        |
| Facility l       |         |        |        |        |        |        |        | 43     | 32     | 31     | 33     | 32     |        |        |        |        |        |        |
| Round 5 (2011 Q) | unknown | 01 Aug | 02 Aug | 03 Aug | 04 Aug | 05 Aug | 08 Aug | 09 Aug | 10 Aug | 11 Aug | 12 Aug | 15 Aug | 16 Aug | 17 Aug | 18 Aug | 19 Aug |        |        |
| Facility a       |         |        |        |        |        |        | 73     | 78     | 81     | 79     | 47     |        |        |        |        |        |        |        |
| Facility b       |         | 48     | 73     | 47     | 68     | 67     |        |        |        |        |        |        |        |        |        |        |        |        |
| Facility c       |         | 54     | 66     | 42     | 60     | 35     |        |        |        |        |        |        |        |        |        |        |        |        |
| Facility d       |         | 20     | 60     | 15     | 31     | 52     |        |        |        |        |        |        |        |        |        |        |        |        |
| Facility e       |         |        |        |        |        |        | 20     | 13     | 15     | 8      | 18     |        | 26     | 22     | 14     | 36     | 28     |        |
| Facility f       |         |        |        |        |        |        |        |        |        |        |        |        |        |        |        |        |        |        |
| Facility g       |         | 83     | 75     | 87     | 61     | 68     |        |        |        |        |        |        |        |        |        |        |        |        |
| Facility h       |         |        |        |        |        |        | 77     | 63     | 55     | 57     | 49     |        |        |        |        |        |        |        |
| Facility i       |         | 19     | 21     | 24     | 23     | 35     |        |        |        |        |        |        |        |        |        |        |        |        |
| Facility j       |         |        |        |        |        |        | 57     | 51     | 49     | 27     | 28     |        |        |        |        |        |        |        |
| Facility k       |         | 17     | 34     | 31     | 21     | 32     |        |        |        |        |        |        |        |        |        |        |        |        |
| Facility l       |         |        |        |        |        |        | 40     | 31     | 49     | 45     | 44     |        |        |        |        |        |        |        |
| Round 6 (2012 Q) | unknown | 12 Jan | 16 Jan | 17 Jan | 18 Jan | 19 Jan | 20 Jan | 23 Jan | 24 Jan | 25 Jan | 26 Jan | 27 Jan | 29 Jan | 30 Jan | 31 Jan | 01 Feb | 02 Feb | 03 Feb |
| Facility a       |         |        |        |        |        |        |        | 91     | 139    | 95     | 121    | 135    | 1      |        |        |        |        |        |
| Facility b       |         |        | 57     | 60     | 68     | 77     | 65     |        |        |        |        |        |        | 1      |        |        |        |        |
| Facility c       |         |        |        |        |        |        |        | 96     | 84     | 92     | 64     | 29     |        |        |        |        |        |        |
| Facility d       |         |        |        |        |        |        |        | 14     | 43     | 16     | 30     | 49     |        |        |        |        |        |        |
| Facility e       |         |        |        |        |        |        |        | 21     | 7      | 9      | 9      | 12     |        |        |        |        |        |        |
| Facility f       |         |        | 11     | 10     | 16     | 6      | 5      |        |        |        |        |        |        |        |        |        |        |        |
| Facility g       |         |        | 45     | 97     | 55     | 52     | 34     |        |        |        |        |        |        |        |        |        |        |        |
| Facility h       |         |        |        |        |        |        |        |        |        |        |        |        |        | 34     | 52     | 51     | 69     | 49     |
| Facility i       |         |        | 28     | 31     | 18     | 32     | 25     |        |        |        |        |        |        |        |        |        |        |        |
| Facility j       |         | 1      |        |        |        |        |        | 54     | 30     | 22     | 19     | 31     |        |        |        |        |        |        |
| Facility k       |         |        |        |        |        |        |        |        |        |        |        |        |        | 42     | 19     | 46     | 44     | 66     |
| Facility l       |         |        |        |        |        |        |        |        |        |        |        |        |        | 22     | 10     | 18     | 40     | 17     |
