# Supplementary material for: Integration of HIV and reproductive health services in public sector facilities: analysis of client flow data over time in Kenya
Source: BMJ Glob Health. 2018 Sep 14;3(5):e000867. doi: 10.1136/bmjgh-2018-000867 (PMC6144905; doi:10.1136/bmjgh-2018-000867)
Supplement: Supplementary file 5 [file bmjgh-2018-000867supp005.pdf]

**Supplemental Table 4. Characteristics of client visits by facility, round and service type in Central Province (HIV-FP)**

[illegible]
